# Supplementary material for: Realizing simultaneous reinforcement and toughening in polypropylene based on polypropylene/elastomer via control of the crystalline structure and dispersed phase morphology
Source: Royal Society of Chemistry journal article supplement (doi:10.1039/c5ra24758f), 2015-12-18
Supplement: c5ra24758f1.pdf [file c5ra24758f1.pdf]

## Support Information

**Realizing simultaneous reinforcement and toughening in  
polypropylene based on polypropylene/elastomer via controlling  
crystalline structure and dispersed phase morphology**

Jianfeng Wang, Hong Wu\*, Shaoyun Guo\*

*The State Key Laboratory of Polymer Materials Engineering, Polymer Research*

*Institute of Sichuan University, Chengdu 610065, China*

**Corresponding Author**

\* E-mail: [wh@scu.edu.cn](mailto:wh@scu.edu.cn). Fax: 86-028-85466077.

\* E-mail: [sguo@scu.edu.cn](mailto:sguo@scu.edu.cn). Fax: 86-028-85405135.

**Table S1** Mechanical properties of C-0, C-20, M-0 and M-6

| Samples | Yield strength<br>(Mpa) | Notched Impact Strength<br>(kJ/m <sup>2</sup> ) | Elongation at break<br>(%) |
|---------|-------------------------|-------------------------------------------------|----------------------------|
| C-0     | 36.4±2.7                | 9.0±0.8                                         | 359±28                     |
| C-20    | 25.5±1.9                | 50.6±4.3                                        | 697±25                     |
| M-0     | 29.3±2.0                | 44.8±3.9                                        | 518±32                     |
| M-6     | 49.3±2.9                | 53.1±4.2                                        | 240±19                     |

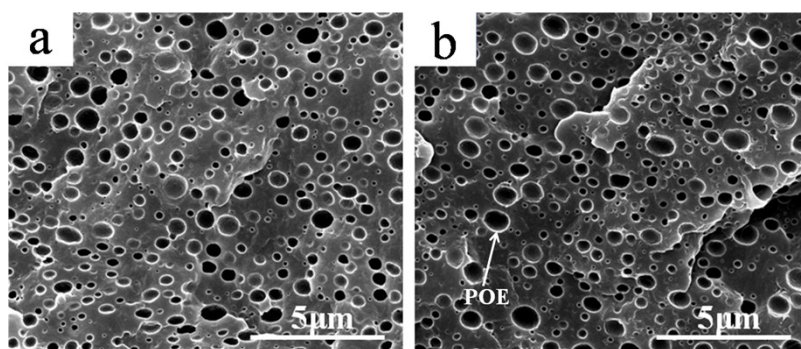

**Fig.S1.** SEM images of heptanes etched surfaces of C-20, a): viewed along melt flowing direction; b): viewed along the planar direction.
